# Supplementary material for: Critical Issues on the Surface Functionalization of Plasmonic Au-Ag/TiO2 Thin Films with Thiolated Oligonucleotide-Based Biorecognition Elements
Source: MDPI journal article supplement (doi:10.3390/bios14040159), 2024-03-27
Supplement: s1 [file s1]

# *Critical issues on the surface functionalization of plasmonic Au-Ag/TiO<sub>2</sub> thin films with thiolated oligonucleotide-based biorecognition elements*

Diogo Costa<sup>1,2,3</sup>, Patrícia Pereira-Silva<sup>1,2</sup>, Paulo Sousa<sup>3,4</sup>, Vânia Pinto<sup>3,4</sup>, Joel Borges<sup>2,5,\*</sup>,  
Filipe Vaz<sup>2,5,6</sup>, Graça Minas<sup>3,4</sup>, and Paula Sampaio<sup>1</sup>

## SUPPLEMENTARY MATERIAL

### a) Au/TiO<sub>2</sub>

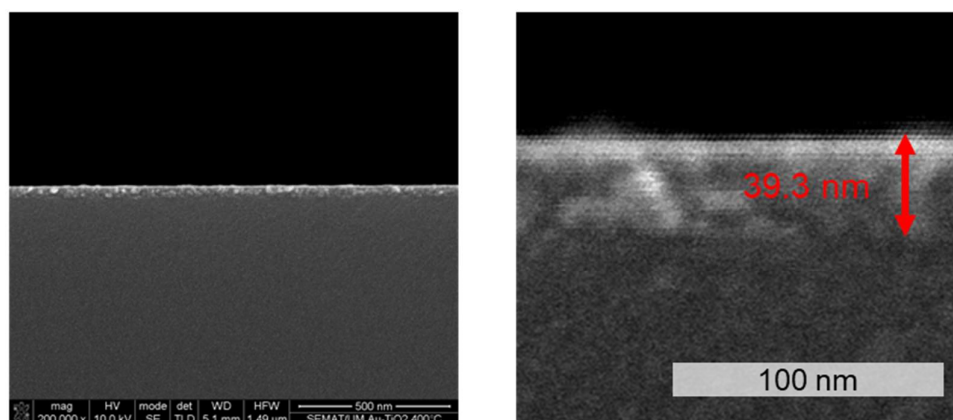

### b) Au-Ag/TiO<sub>2</sub>

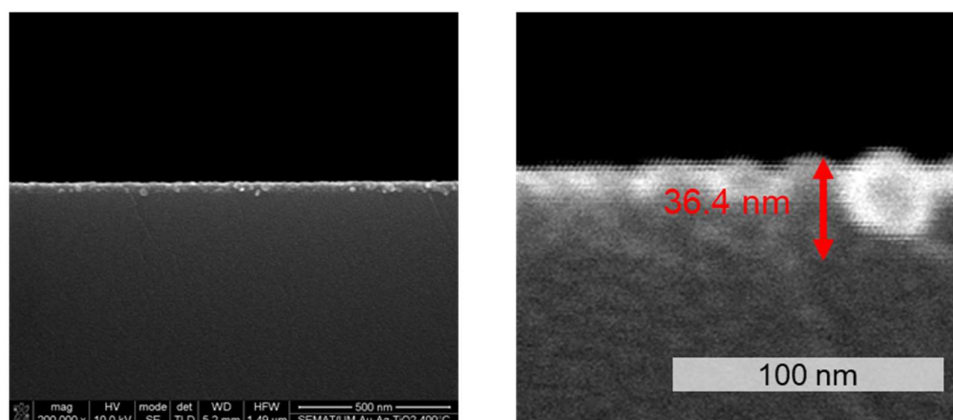

Figure S1 - SEM micrographs at different magnifications and thickness measurements for thin films annealed at 400 °C: a) Au/TiO<sub>2</sub> and b) Au-Ag/TiO<sub>2</sub>. The images were obtained using a NanoSEM - FEI Nova 200 (FEG/SEM) scanning electron microscope at 10.0 kV.
